# Supplementary material for: Linking Stochastic Fluctuations in Chromatin Structure and Gene Expression
Source: PubMed Central journal article supplement (PMC3735467; doi:10.1371/journal.pbio.1001621), 2013-08-06
Supplement: pbio.1001621.s006.pdf [file pbio.1001621.s006.pdf]

| Strain  | Parental Strain | Plasmid  | Relevant Genotype                                               | Source                     |
|---------|-----------------|----------|-----------------------------------------------------------------|----------------------------|
| yM2.1   | yM1.12          | pM53.1   | <i>PHO4, PHO80, PHO5[GC, TATA]</i>                              | Boeger et al., 2003        |
| yM8.14  | yM2.1           | pM67.6   | <i>PHO4, pho80::HIS3, PHO5[GC, TATA]</i>                        | Boeger et al., 2003        |
| yM19.2  | yM17.3          | pM70.1   | <i>PHO4, pho80::HIS3, PHO5[GC, tata]</i>                        | Boeger et al., 2003        |
| yM63.19 | yM19.2          | pCM4.5   | <i>pho4::URA3, pho80::HIS3, PHO5[GC, tata]</i>                  | Mao et al., 2010           |
| yM89.1  | yM63.19         | pCM61.5  | <i>pho4:Δ85-99, pho80::HIS3, PHO5[GC, tata]</i>                 | Mao et al., 2010           |
| yM156.1 | yM2.1           | pCM118.1 | <i>PHO4, PHO80, PHO5[GC, TATA], pho2::KanMX</i>                 | This study                 |
| yE2.1   | EY2343          | pCM43.12 | <i>PHO4, pho80::LEU2, PHO5p:CFP-KanR</i>                        | Mao et al., 2010           |
| yE4.1   | yE2.1           | pCM4.5   | <i>pho4::URA3, pho80::LEU2, PHO5p:CFP-KanR</i>                  | Mao et al., 2010           |
|         |                 | pSH17    | <i>TEF2p:LexA-TAP, GAL1p:R-Recombinase (Z. rouxii), LEU2-RS</i> | S. Hamperl (U. Regensburg) |
