# Supplementary material for: Linking Stochastic Fluctuations in Chromatin Structure and Gene Expression
Source: PubMed Central journal article supplement (PMC3735467; doi:10.1371/journal.pbio.1001621), 2013-08-06
Supplement: pbio.1001621.s007.pdf [file pbio.1001621.s007.pdf]

| <b>Figure</b>         | <b>4E</b>              | <b>5A</b>              | <b>5B</b>                     | <b>5C</b>              | <b>5D</b>                           | <b>5E</b>                            |
|-----------------------|------------------------|------------------------|-------------------------------|------------------------|-------------------------------------|--------------------------------------|
| <b>Genotype</b>       | <i>PHO4 pho80 TATA</i> | <i>PHO4 pho80 tata</i> | <i>Pho4[85-99] pho80 tata</i> | <i>pho4 pho80 tata</i> | <i>PHO4<sup>cs1</sup> pho2 TATA</i> | <i>PHO4<sup>cs1</sup> PHO80 TATA</i> |
| <b>Topology</b>       | Fig. 4F                | Fig. 4D                | Fig. 4F                       | Fig. 4D                | Fig. 4D                             | Fig. 4D                              |
| $\gamma_D / \gamma_A$ | 1.8                    | 1.56                   | 0.68                          | 0.15                   | 0.25                                | 0.23                                 |
| $\gamma_S / \gamma_A$ | 3.64                   | 1.7                    | 2.04                          | 0.64                   | 0.45                                | 0.36                                 |
