# Supplementary material for: Linking Stochastic Fluctuations in Chromatin Structure and Gene Expression
Source: PLoS Biol. 2013 Aug 6;11(8):e1001621. doi: 10.1371/journal.pbio.1001621 (PMC3735467; doi:10.1371/journal.pbio.1001621)
Supplement: Text S2 — Kinetic parameter values. (DOCX) [file pbio.1001621.s009.docx]

**Supporting Text S2.** *Kinetic Parameter Values*

Parameter values for the integrated model of Fig. 8A were min-1 (transition from active to conducive states), min-1 (nucleosome assembly), min-1 (nucleosome disassembly), (nucleosome sliding), min-1 (the hat ^ refers to molecules isolated from *PHO4* *pho80* *TATAPHO5* cells); and min-1, min-1, min-1 (the prime refers to *pho4* *pho80* *tataPHO5* cells). The values of other parameters were as indicated for Fig. 5B: h-1, h-1, min-1, min-1. The parameter values were determined, as described in the main text, from EM, RNA-FISH, northern blot analysis, and measurements of protein molecule number; with as indicated above, which gives (Fig. 6B).
